# Supplementary material for: Comparative transcriptome analysis of cold-tolerant and -sensitive asparagus bean under chilling stress and recovery
Source: PeerJ. 2022 Mar 22;10:e13167. doi: 10.7717/peerj.13167 (PMC8953502; doi:10.7717/peerj.13167)
Supplement: Supplemental Information 3 — C0, C3, C12, C24 represent 5 ° C cold stress for 0, 3, 12, 24 h, respectively. R3, R12, R24 indicate 25 ° C recovery for 3, 12, 24 h, respectively. [file peerj-10-13167-s003.xlsx]

## Sheet: Sheet1
Table S2. Raw data of leaf fresh weight of Dubai bean and Ningjiang 3 under cold stress and recovery (6 repeats). C0, C3, C12, C24 represent 5℃ cold stress for 0, 3, 12, 24 hours, respectively. R3, R12, R24 indicate 25℃ recovery for 3, 12, 24 hours, respectively.
	Dubai bean (g)	Mean	Standard Deviation	Ningjiang 3 (g)	Mean	Standard Deviation
C0	0.18	0.2	0.03	0.28	0.31	0.03
C0	0.18			0.35
C0	0.22			0.34
C0	0.22			0.29
C0	0.22			0.31
C0	0.16			0.31
C3	0.17	0.18	0.01	0.3	0.28	0.02
C3	0.16			0.25
C3	0.19			0.27
C3	0.18			0.29
C3	0.19			0.27
C3	0.18			0.27
C12	0.11	0.12	0.02	0.2	0.2	0.03
C12	0.14			0.22
C12	0.1			0.26
C12	0.14			0.19
C12	0.13			0.18
C12	0.11			0.16
C24	0.14	0.12	0.02	0.23	0.19	0.03
C24	0.11			0.2
C24	0.1			0.16
C24	0.14			0.15
C24	0.13			0.22
C24	0.11			0.17
R3	0.09	0.12	0.03	0.19	0.17	0.03
R3	0.15			0.16
R3	0.16			0.14
R3	0.1			0.21
R3	0.15			0.2
R3	0.1			0.15
R12	0.06	0.08	0.03	0.29	0.26	0.03
R12	0.08			0.26
R12	0.12			0.25
R12	0.08			0.28
R12	0.05			0.22
R12	0.1			0.29
R24	0.07	0.07	0.01	0.29	0.27	0.02
R24	0.06			0.28
R24	0.06			0.3
R24	0.08			0.26
R24	0.07			0.25
R24	0.07			0.24
