# Supplementary material for: Comparative transcriptome analysis of cold-tolerant and -sensitive asparagus bean under chilling stress and recovery
Source: PeerJ. 2022 Mar 22;10:e13167. doi: 10.7717/peerj.13167 (PMC8953502; doi:10.7717/peerj.13167)
Supplement: Supplemental Information 4 — C0, C3, C12, C24 represent 5 ° C cold stress for 0, 3, 12, 24 h, respectively. R3, R12, R24 indicate 25 ° C recovery for 3, 12, 24 h, respectively. [file peerj-10-13167-s004.xlsx]

## Sheet: Sheet1
Table S3. Raw data of proline content of Dubai bean and Ningjiang 3 under cold stress and recovery (3 repeats). C0, C3, C12, C24 represent 5℃ cold stress for 0, 3, 12, 24 hours, respectively. R3, R12, R24 indicate 25℃ recovery for 3, 12, 24 hours, respectively.
	Dubai bean (µg/g)	Mean	Standard Deviation	Ningjiang 3 (µg/g)	Mean	Standard Deviation
C0	118.22	144.83	23.97	170.69	175.86	8.96
C0	151.53			170.69
C0	164.73			186.21
C3	170.69	160.34	17.92	253.19	274.14	31.01
C3	139.66			259.46
C3	170.69			309.76
C12	294.83	325.86	31.03	324.57	356.9	28.04
C12	325.86			374.49
C12	356.9			371.65
C24	418.97	372.41	41.05	387.93	439.66	44.79
C24	341.38			465.52
C24	356.9			465.52
R3	465.52	527.59	62.07	651.72	605.17	67.64
R3	589.66			636.21
R3	527.59			527.59
R12	337.55	367.24	54.01	686.67	641.38	63.02
R12	429.58			569.41
R12	334.6			668.05
R24	370.22	382.76	42.96	510.39	579.31	59.98
R24	430.59			619.74
R24	347.46			607.79
