# Supplementary material for: Comparative transcriptome analysis of cold-tolerant and -sensitive asparagus bean under chilling stress and recovery
Source: PeerJ. 2022 Mar 22;10:e13167. doi: 10.7717/peerj.13167 (PMC8953502; doi:10.7717/peerj.13167)
Supplement: Supplemental Information 5 — C0, C3, C12, C24 represent 5 ° C cold stress for 0, 3, 12, 24 h, respectively. R3, R12, R24 indicate 25 ° C recovery for 3, 12, 24 h, respectively. [file peerj-10-13167-s005.xlsx]

## Sheet: Sheet1
Table S4. Raw data of SOD content of Dubai bean and Ningjiang 3 under cold stress and recovery (3 repeats). C0, C3, C12, C24 represent 5℃ cold stress for 0, 3, 12, 24 hours, respectively. R3, R12, R24 indicate 25℃ recovery for 3, 12, 24 hours, respectively.
	Dubai bean (U/g)	Mean	Standard Deviation	Ningjiang 3 (U/g)	Mean	Standard Deviation
C0	318.65	315.99	8.05	334.72	307.25	24.27
C0	306.95			298.32
C0	322.38			288.71
C3	526.53	503.26	59.02	258.18	271.91	11.95
C3	547.09			279.96
C3	436.15			277.6
C12	837.61	759.39	69.92	421.14	380.84	34.96
C12	702.96			358.59
C12	737.61			362.8
C24	818.27	868.49	76.19	515.84	553.29	33.12
C24	956.16			578.71
C24	831.05			565.32
R3	1212.4	1126.61	106.05	524.39	543.53	21.46
R3	1008.04			566.72
R3	1159.4			539.47
R12	698.89	781.12	71.24	592.15	614.28	58.19
R12	820.13			571.21
R12	824.33			680.47
R24	630.6	600.01	45.8	588.1	535.19	45.84
R24	622.03			510.17
R24	547.41			507.31
