# Supplementary material for: Comparative transcriptome analysis of cold-tolerant and -sensitive asparagus bean under chilling stress and recovery
Source: PeerJ. 2022 Mar 22;10:e13167. doi: 10.7717/peerj.13167 (PMC8953502; doi:10.7717/peerj.13167)
Supplement: Supplemental Information 8 — N stands for Ningjiang 3 and D stands for Dubai bean. C0, C3, C12, C24 represent 5 ° C cold stress for 0, 3, 12, 24 h, respectively. R3, R12, R24 indicate 25 ° C recovery for 3, 12, 24 h, respectively. [file peerj-10-13167-s008.xlsx]

## Sheet: Sheet1
Table S7. Raw data of FPKM value of selected genes calculated by RNA-seq. N stands for Ningjiang 3 and D stands for Dubai bean. C0, C3, C12, C24 represent 5℃ cold stress for 0, 3, 12, 24 hours, respectively. R3, R12, R24 indicate 25℃ recovery for 3, 12, 24 hours, respectively.
geneID	Description	NC0-1	NC0-2	NC0-3	NC3-1	NC3-2	NC3-3	NC12-1	NC12-2	NC12-3	NC24-1	NC24-2	NC24-3	NR3-1	NR3-2	NR3-3	NR12-1	NR12-2	NR12-3	NR24-1	NR24-2	NR24-3	DC0-1	DC0-2	DC0-3	DC3-1	DC3-2	DC3-3	DC12-1	DC12-2	DC12-3	DC24-1	DC24-2	DC24-3	DR3-1	DR3-2	DR3-3	DR12-1	DR12-2	DR12-3	DR24-1	DR24-2	DR24-3
LOC114164089	ICE1	8.0162	7.10678	7.60365	4.53034	4.54015	4.51082	5.05737	4.50456	4.53871	6.63739	7.36179	6.52966	4.84718	4.81023	3.82402	6.44872	6.15319	5.5814	5.97154	7.729	7.93084	19.8723	18.4484	19.522	3.49026	5.5935	5.85207	5.25172	5.82808	6.75734	7.70056	9.56018	7.45646	5.78419	5.52821	5.22616	4.00364	3.60196	4.25527	6.08682	6.92218	6.04934
LOC114189602	DREB1A	0.236432	0.304887	0.288622	2.62379	3.09578	3.46856	118.495	118.372	120.733	288.712	286.845	339.158	176.141	175.612	137.131	9.59828	11.2998	11.5839	6.35288	6.98699	7.54463	0.605287	0.461209	0.348056	3.21653	4.64526	3.76323	93.4927	84.4197	85.7305	151.787	155.742	183.254	83.0894	102.53	80.5369	20.5462	19.8935	20.4127	7.99741	8.15203	8.34278
LOC114181127	DREB1D	0.608299	0.255453	0.394085	28.5517	33.7544	25.6433	116.343	109.975	118.363	118.658	126.952	109.481	24.6811	23.8204	20.8424	2.87022	3.31694	4.73304	3.85312	1.49467	1.90474	1.03039	0.925936	0.550842	29.0771	53.0382	52.1182	200.346	218.116	220.051	87.5154	85.0072	102.423	16.5133	21.5956	19.524	7.71058	6.43067	6.53852	1.63442	1.90814	1.5037
LOC114177333	DREB1E	0	0	0.0790614	0	0.0339207	0.0298472	2.33092	1.97514	2.20372	5.53911	5.37401	8.98459	23.3947	22.1646	21.2261	0.567675	1.08891	0.991611	0.437662	0.152707	0.390317	0.142118	0.131831	0	0.0364591	0	0.555966	1.91684	1.93061	2.06236	6.15434	6.84137	7.60747	13.1141	9.46864	12.9258	2.29944	2.4069	1.64593	1.07512	1.33984	0.845254
LOC114174637	DREB1E	0	0.0441376	0.0557107	0.22509	0.0478045	0	30.3002	28.6476	30.372	146.874	155.666	244.779	140.149	137.939	125.25	8.00026	8.14193	10.155	4.89033	4.82071	3.80821	0	0	0.0503871	0.102764	0.0439172	0	38.8512	38.5022	41.2618	336.966	305.632	499.722	84.9002	99.5643	92.5881	24.3971	22.5549	20.8766	8.5534	11.3294	9.79446
LOC114192600	DREB1F	0	0.0339723	0	0	0.110384	0	1.35855	2.49957	1.82797	6.72052	9.20167	15.3808	92.2756	88.404	101.92	3.85668	5.54493	5.77252	0.881666	0.662581	0.651365	0	0	0	0	0	0	1.02072	0.908798	0.87886	5.64306	5.35286	11.3465	70.6813	35.0574	72.8454	17.9231	20.4458	20.5022	6.65871	4.98294	6.24829
LOC114174123	DREB3	4.6821	5.21621	6.30573	1.45183	2.34736	1.71538	1.06093	1.0618	1.33038	1.97312	2.44835	2.04768	2.63353	2.26227	1.80853	6.8335	7.91146	6.62946	2.89668	4.0479	2.25381	8.12618	8.11779	6.91929	1.75328	3.32609	4.84995	2.7388	2.17897	2.50534	2.95119	2.28012	3.30316	3.88236	3.56533	3.72367	5.39404	4.72954	3.63581	2.0339	1.9307	2.42343
LOC114177032	TINY	3.86033	3.03077	2.29956	1.06369	0.756095	0.843789	4.06648	3.84781	3.84088	5.26437	5.65011	5.7874	7.40286	9.02861	7.70509	6.15621	7.1533	7.27784	2.95725	2.22496	2.00774	12.0339	12.2916	11.2544	0.87214	1.32146	1.22792	3.63792	4.238	5.10558	30.8523	31.32	13.6802	7.07818	2.56436	7.16812	2.42879	1.95431	1.71509	3.2619	1.62333	3.47201
LOC114191951	RAP2.3	1.12644	1.04207	1.04128	1.75297	2.33567	1.86207	4.40517	4.58283	5.36154	6.46577	5.60319	8.91402	12.3677	12.1161	9.4301	1.43595	1.23008	1.32892	0.910146	0.903293	0.888002	4.15403	3.57918	3.94887	38.7014	41.5034	44.3679	133.55	132.414	133.464	169.89	168.565	164.912	43.7772	55.7054	43.46	20.9338	20.6712	20.8665	9.55218	8.27923	9.85213
LOC114163069	RAP2.4	95.6975	91.4846	98.9506	178.343	188.157	187.87	124.957	130.785	133.807	110.409	128.933	98.6295	55.3119	57.0126	59.5542	101.299	100.724	92.226	104.016	100.49	112.692	86.6902	97.2536	82.4918	215.402	202.281	215.078	119.894	105.879	126.028	66.2352	69.0112	79.2029	54.0385	38.9196	46.8761	71.3138	70.0613	72.6781	79.0483	78.0612	77.2603
LOC114194502	RAP2.4	68.6835	66.5589	68.8058	131.203	144.348	139.8	462.384	480.575	477.91	513.555	535.86	523.608	298.253	300.051	336.928	110.144	116.777	115.482	87.6447	82.0526	90.5697	78.4084	71.7062	72.8234	112.22	145.384	154.098	497.702	481.471	495.671	298.975	307.637	337.325	156.172	151.125	159.834	129.365	126.758	137.378	141.777	146.021	140.44
