# Supplementary material for: Comparative transcriptome analysis of cold-tolerant and -sensitive asparagus bean under chilling stress and recovery
Source: PeerJ. 2022 Mar 22;10:e13167. doi: 10.7717/peerj.13167 (PMC8953502; doi:10.7717/peerj.13167)
Supplement: Supplemental Information 9 — N stands for Ningjiang 3 and D stands for Dubai bean. C0, C3, C12, C24 represent 5 ° C cold stress for 0, 3, 12, 24 h, respectively. R3, R12, R24 indicate 25 ° C recovery for 3, 12, 24 h, respectively. [file peerj-10-13167-s009.xlsx]

## Sheet: Sheet1
Table S8. Raw data of relative expression value of selected genes calculated by qPCR.N stands for Ningjiang 3 and D stands for Dubai bean. C0, C3, C12, C24 represent 5℃ cold stress for 0, 3, 12, 24 hours, respectively. R3, R12, R24 indicate 25℃ recovery for 3, 12, 24 hours, respectively.
geneID	Description	NC0-1	NC0-2	NC0-3	NC3-1	NC3-2	NC3-3	NC12-1	NC12-2	NC12-3	NC24-1	NC24-2	NC24-3	NR3-1	NR3-2	NR3-3	NR12-1	NR12-2	NR12-3	NR24-1	NR24-2	NR24-3	DC0-1	DC0-2	DC0-3	DC3-1	DC3-2	DC3-3	DC12-1	DC12-2	DC12-3	DC24-1	DC24-2	DC24-3	DR3-1	DR3-2	DR3-3	DR12-1	DR12-2	DR12-3	DR24-1	DR24-2	DR24-3
LOC114164089	ICE1	0.74147	0.91485	0.74049	0.41794	0.34733	0.35262	0.39955	0.48686	0.38709	0.95684	0.89339	1.04954	0.19249	0.22494	0.20423	0.54758	0.50666	0.54632	0.58966	0.70077	0.59978	1.69764	1.66223	1.83754	0.36835	0.44764	0.4822	1.25995	1.24941	1.08686	1.12865	1.01757	1.06708	0.74175	0.75354	0.6438	0.45894	0.4377	0.36255	1.30306	1.40948	1.24542
LOC114189602	DREB1A	0.14691	0.14895	0.13514	0.24729	0.22806	0.24483	1.23207	1.29614	1.22914	1.92072	1.90556	1.84735	1.13969	1.00506	1.13074	0.49816	0.44186	0.44955	0.36513	0.38597	0.38275	0.24126	0.24994	0.24863	0.24823	0.25029	0.23495	0.58485	0.53965	0.54362	1.17668	1.14554	1.24625	0.62962	0.60319	0.65605	0.28254	0.32164	0.27494	0.19331	0.17975	0.18044
LOC114181127	DREB1D	0.22027	0.25256	0.25895	0.15322	0.19534	0.15802	1.23819	1.27915	1.36889	1.51818	1.52699	1.25605	0.99382	0.81666	0.98228	0.21181	0.21965	0.19197	0.24214	0.23311	0.20992	0.30235	0.33115	0.31675	0.87627	0.90278	0.99154	1.82449	1.78449	1.60526	1.01326	1.13635	1.12504	0.75109	0.74757	0.81206	0.35715	0.42948	0.46767	0.34	0.26566	0.33094
LOC114177333	DREB1E	0.44734	0.45678	0.39914	0.34092	0.30115	0.32435	1.07726	1.01525	1.17065	1.60621	1.36566	1.71587	1.60006	1.91314	1.91044	0.8231	0.84519	0.93745	0.24214	0.23311	0.20992	0.23092	0.20155	0.23101	0.48048	0.49242	0.56574	0.76465	0.66788	0.72351	1.51093	1.67425	1.34761	1.20872	1.43074	1.21671	1.08323	1.16786	1.16705	0.83553	0.80182	0.72266
LOC114174637	DREB1E	0.21615	0.22525	0.18755	0.39823	0.46822	0.51034	0.95905	0.81422	0.84534	1.31255	1.11495	1.41496	0.95585	1.02448	1.04184	0.23826	0.27008	0.28741	0.2218	0.25145	0.23535	0.2179	0.21888	0.24254	0.21661	0.17926	0.21916	1.79655	1.42045	1.49834	1.69495	1.6721	2.02911	1.01397	1.09774	1.00505	0.43326	0.52212	0.47982	0.41856	0.38258	0.38455
LOC114192600	DREB1F	0.19364	0.20525	0.19319	0.20948	0.21732	0.24334	0.31726	0.31408	0.33274	0.8574	0.72461	0.85306	1.63836	1.62293	1.78885	0.78911	0.92125	0.74196	0.19774	0.18056	0.19473	0.17317	0.18461	0.19605	0.11524	0.12664	0.11155	0.29874	0.26683	0.27047	0.86836	0.88805	0.77736	1.24674	1.23548	1.10368	0.52555	0.57657	0.58874	0.47737	0.52985	0.46875
LOC114174123	DREB3	0.74395	0.87667	0.93099	0.40107	0.34275	0.38571	0.36955	0.36804	0.42995	0.31062	0.40145	0.37284	0.69626	0.763	0.79117	1.60714	1.61006	1.43502	1.04987	1.07442	0.82675	1.24826	1.49645	1.5577	1.13149	1.17368	0.99295	0.8995	0.88747	1.11225	1.05553	1.29874	1.13052	1.49175	1.71666	1.56951	1.77325	1.71038	1.50026	0.19503	0.17146	0.19253
LOC114177032	TINY	0.44148	0.46831	0.36386	0.49772	0.54878	0.61394	0.92394	0.87355	0.85409	0.94081	1.15474	0.96502	1.07393	1.27829	1.06115	1.19256	1.02314	1.15465	0.18166	0.20872	0.21457	1.51176	1.29503	1.22674	0.26185	0.22538	0.21486	0.36415	0.39515	0.36876	1.72414	1.71499	1.39195	1.43012	1.45227	1.18186	0.46275	0.52045	0.41321	0.96457	0.90986	0.85515
LOC114191951	RAP2.3	0.40886	0.43994	0.43424	0.21117	0.21332	0.22414	0.57246	0.67937	0.57346	0.40615	0.45491	0.4425	0.56351	0.61534	0.57279	0.33245	0.3374	0.30206	0.16847	0.16335	0.17359	0.34021	0.35845	0.29833	1.04264	1.06807	1.17645	1.33246	1.60139	1.71795	1.81406	1.66306	1.96506	1.12465	1.07162	1.06056	1.32995	1.50855	1.47094	0.75775	0.92484	0.90782
LOC114163069	RAP2.4	1.50707	1.47434	1.33857	1.96665	1.86335	1.78225	1.38468	1.57154	1.22748	0.93535	0.908	0.86655	0.02625	0.03294	0.02843	0.80574	0.71615	0.68755	0.99084	0.98514	0.9139	0.30426	0.33282	0.35886	1.88425	1.55067	1.87955	1.50466	1.59296	1.68126	0.40194	0.43805	0.34746	0.09134	0.07926	0.09558	0.33975	0.41809	0.4317	0.48025	0.4433	0.37366
LOC114194502	RAP2.4	0.9083	0.81566	1.00094	0.70176	0.69065	0.73765	1.06755	1.18078	1.29401	1.6206	1.57402	1.78025	1.61695	1.39095	1.58405	0.99915	0.86429	0.86332	0.48066	0.53363	0.58411	0.38553	0.32175	0.40272	0.27117	0.2772	0.32514	1.64126	1.87318	1.87797	1.21197	1.32128	1.10266	1.65229	1.62727	1.48555	1.19425	1.24365	1.14485	0.54312	0.61714	0.53606
